# Supplementary material for: Organic vanadium oxy-acetylacetonate as electro-active anode material with high capacity and rate performance for lithium-ion batteries
Source: Springer Nature journal article supplement (doi:10.1007/s10853-018-2250-3), 2018-03-26
Supplement: MOESM1 [file 15568518]

Supplementary Information

Organic Vanadium Oxy-Acetylacetonate as Electro-Active Anode Material with High Capacity and Rate Performance for Lithium-ion Batteries

*Xinran Wangab, Shaona Wanga, Yi Zhanga, Hao Duab**

a Key Laboratory of Green Process and Engineering, National Engineering Laboratory for Hydrometallurgical Cleaner Production Technology, Institute of Process Engineering, Chinese Academy of Sciences, Beijing, China.

b University of Chinese Academy of Sciences, No.19A Yuquan Road, Beijing, China.

*Corresponding author: Hao Du, Fax: +86-10-82544856; Tel: +86-10-82544856;

E-mail: duhao121@hotmail.com.

**b**

**a**

**Figure S1** The crystallinity of decomposed product fromVO(acac)2 in Ar gas atmosphere and its rate performance: (a) the XRD spectra and (b) the rate performance.

**b**

**a**

**Figure S2** The crystallinity and rate performance of VO(acac)2 of high purity (99.95 %): (a) the XRD spectra and (b) the rate performance, showing very similar capacity retention of that with the prepared VO(acac)2 in this study.
